# Supplementary material for: Photoactive europium(iii) centered mesoporous hybrids with 2-thenoyltrifluoroacetone functionalized SBA-16 and organic polymers
Source: Royal Society of Chemistry journal article supplement (doi:10.1039/b919008b), 2010-01-01
Supplement: b919008b.pdf [file b919008b.pdf]

## Electronic Supporting Information

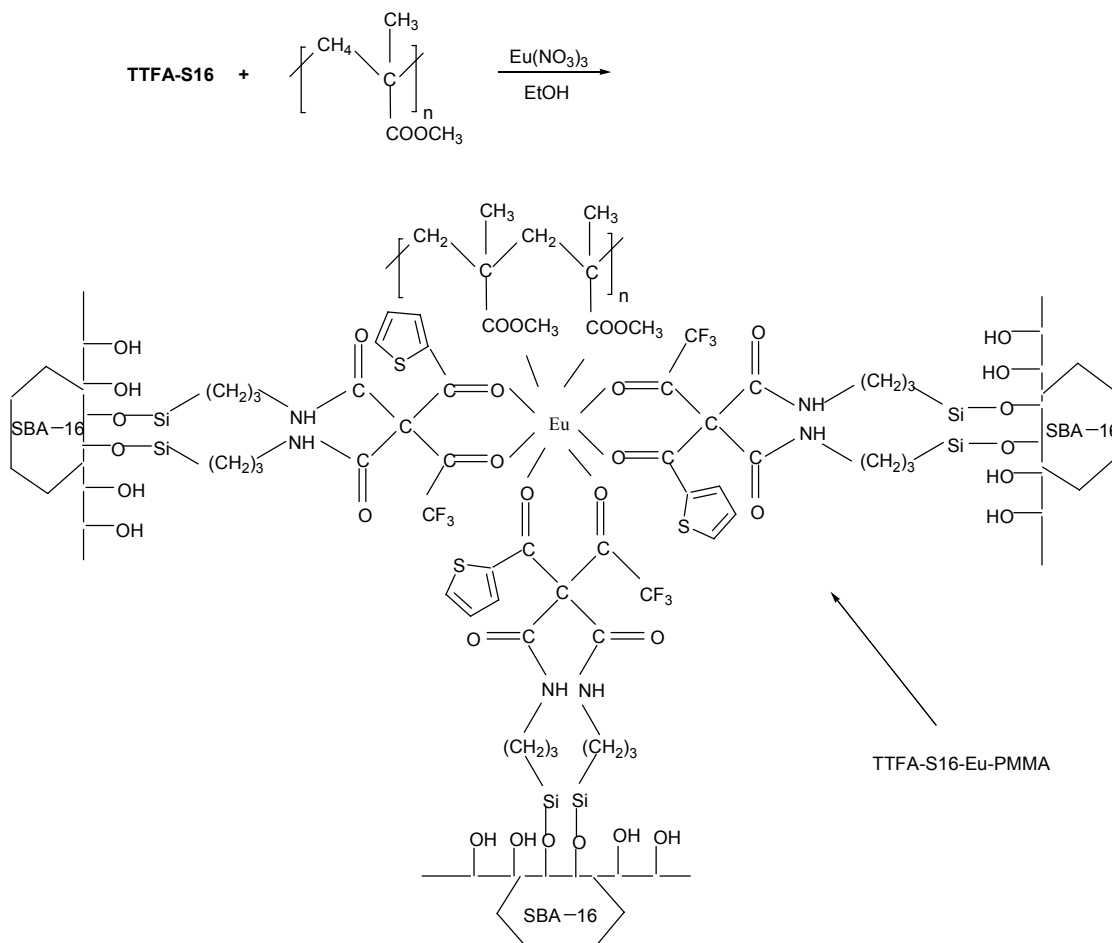

**Fig. S1** The predicted structure of mesoporous polymeric hybrid material TTFA-S16-Eu-PMMA.

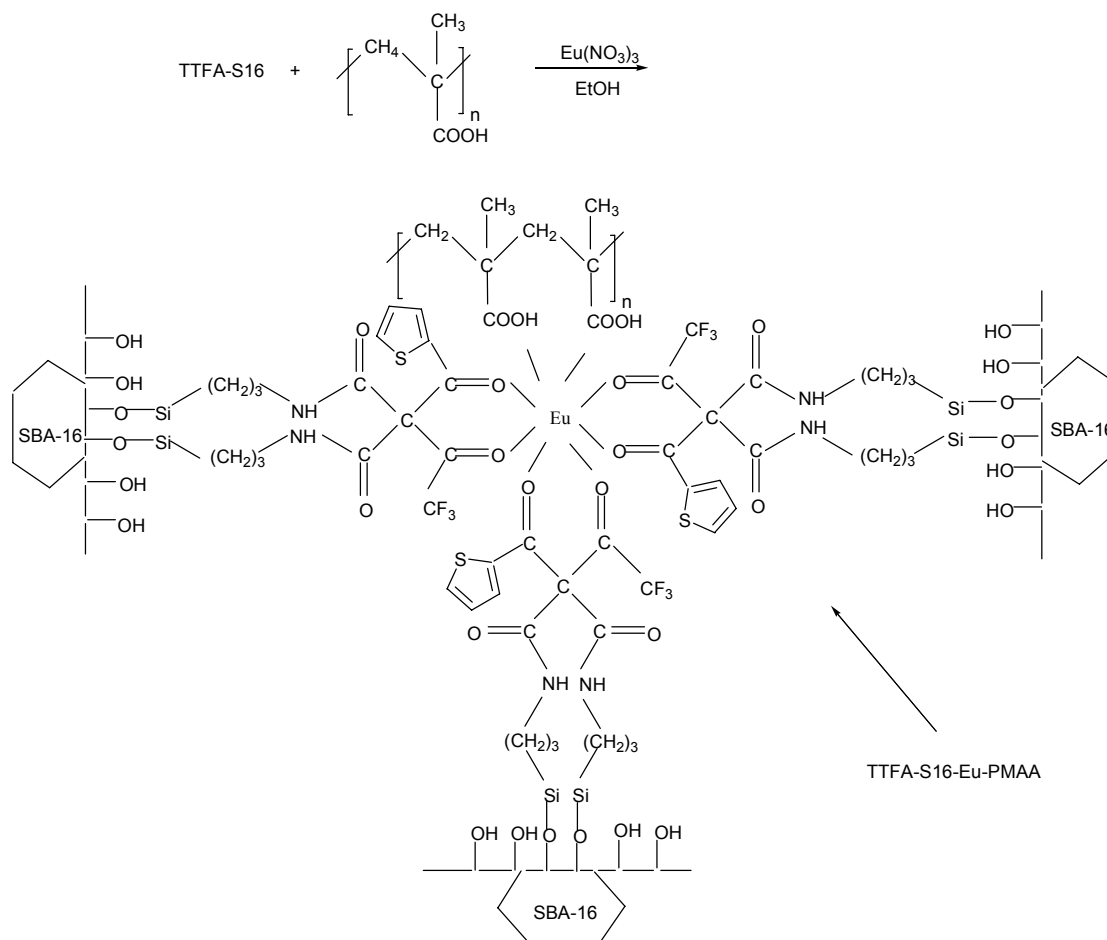

**Fig. S2** The predicted structure of mesoporous polymeric hybrid material TTFA-S16-Eu-PMMA.

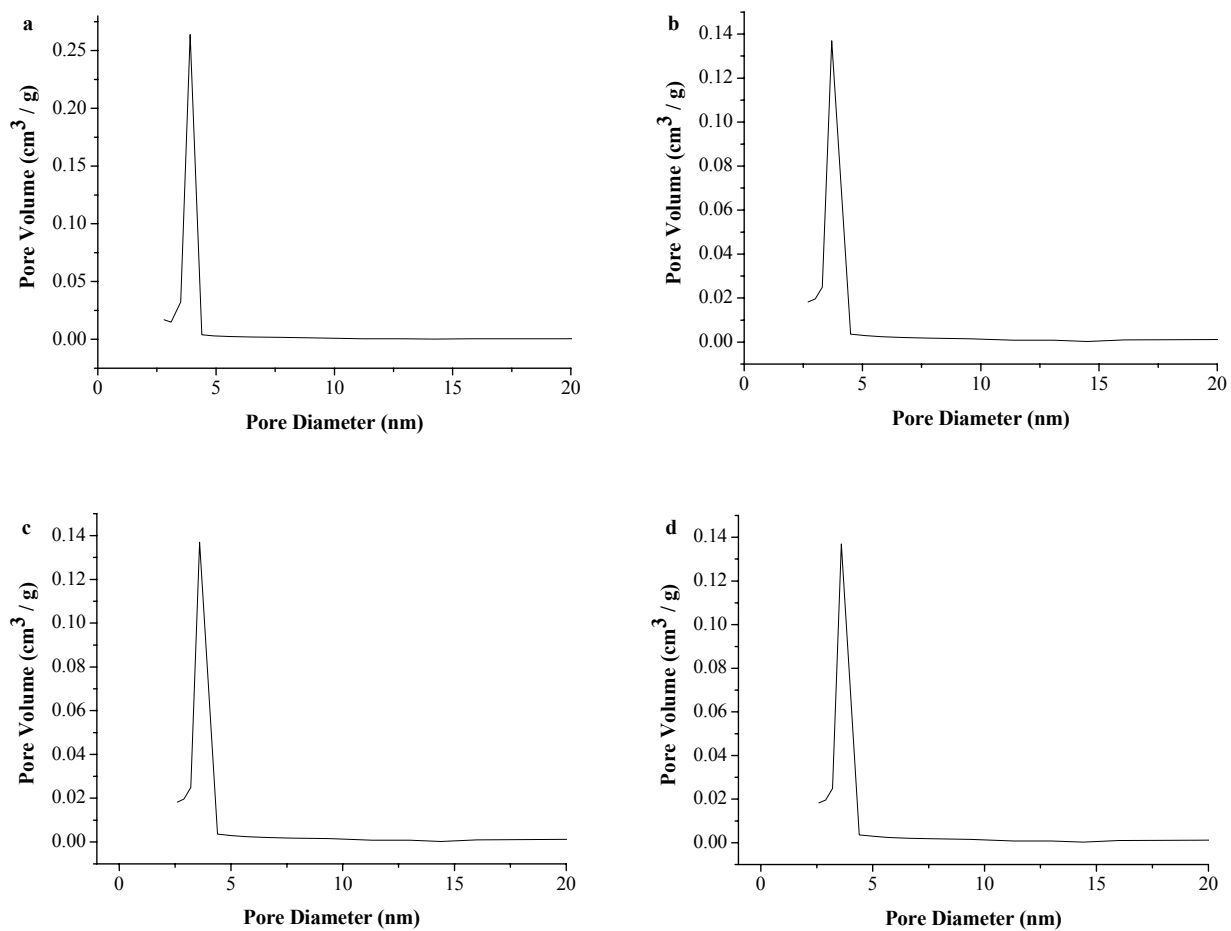

**Fig. S3** Pore size distributions for TTFA-S16 (a), TTFA-S16-Eu-PMMA (b), TTFA-S16-Eu-PMAA (c) and TTFA-S16-Eu-PVP (d).

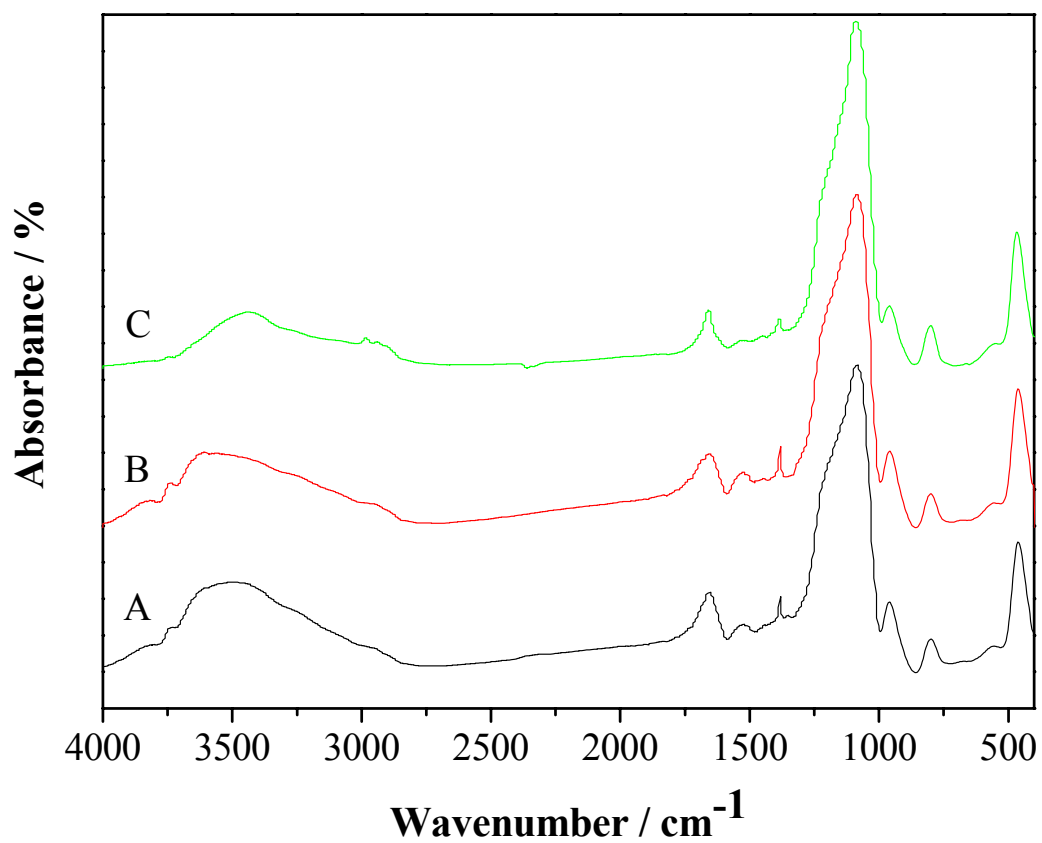

**Fig. S4** FTIR spectra of rare earth mesoporous polymeric hybrids TTFA-S16-Eu-PMMA (A), TTFA-S16-Eu-PMAA (B) and TTFA-S16-Eu-PVP (C).

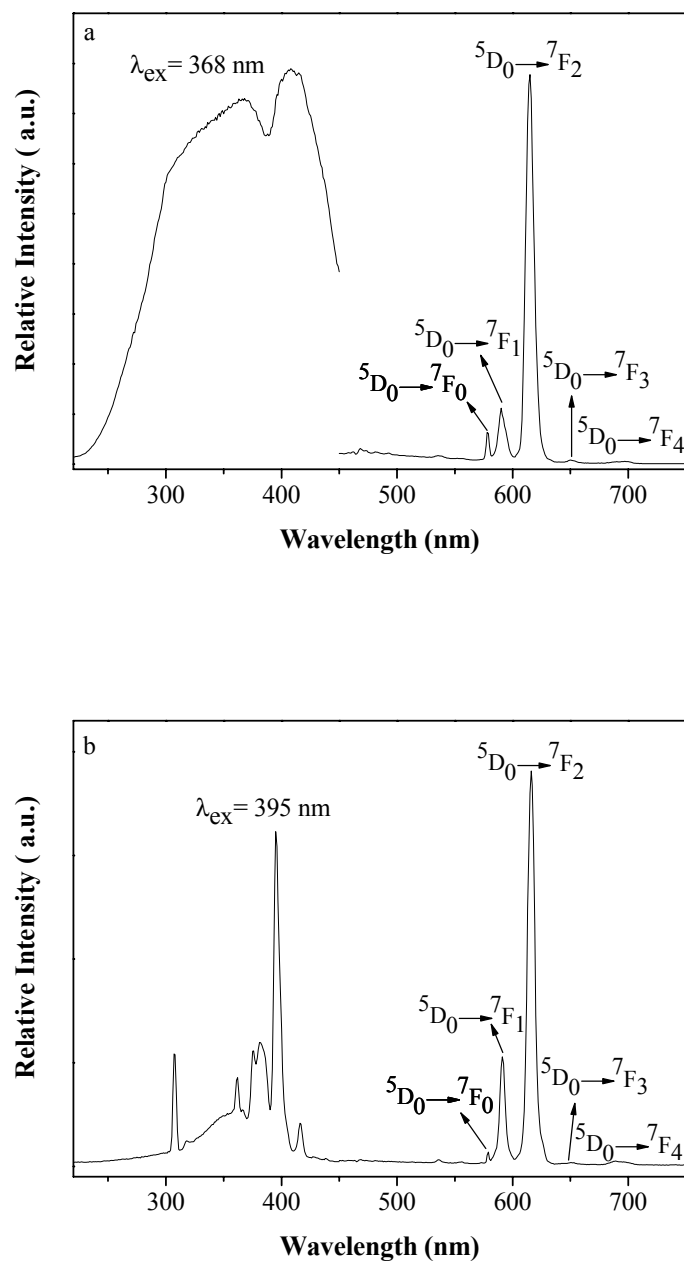

**Fig. S5** Fluorescent excitation and emission spectra of the mesoporous hybrid material: (a)  $\text{Eu}(\text{TTFA})_3\text{PVP}$  and (b)  $\text{Eu-PVP}$ .

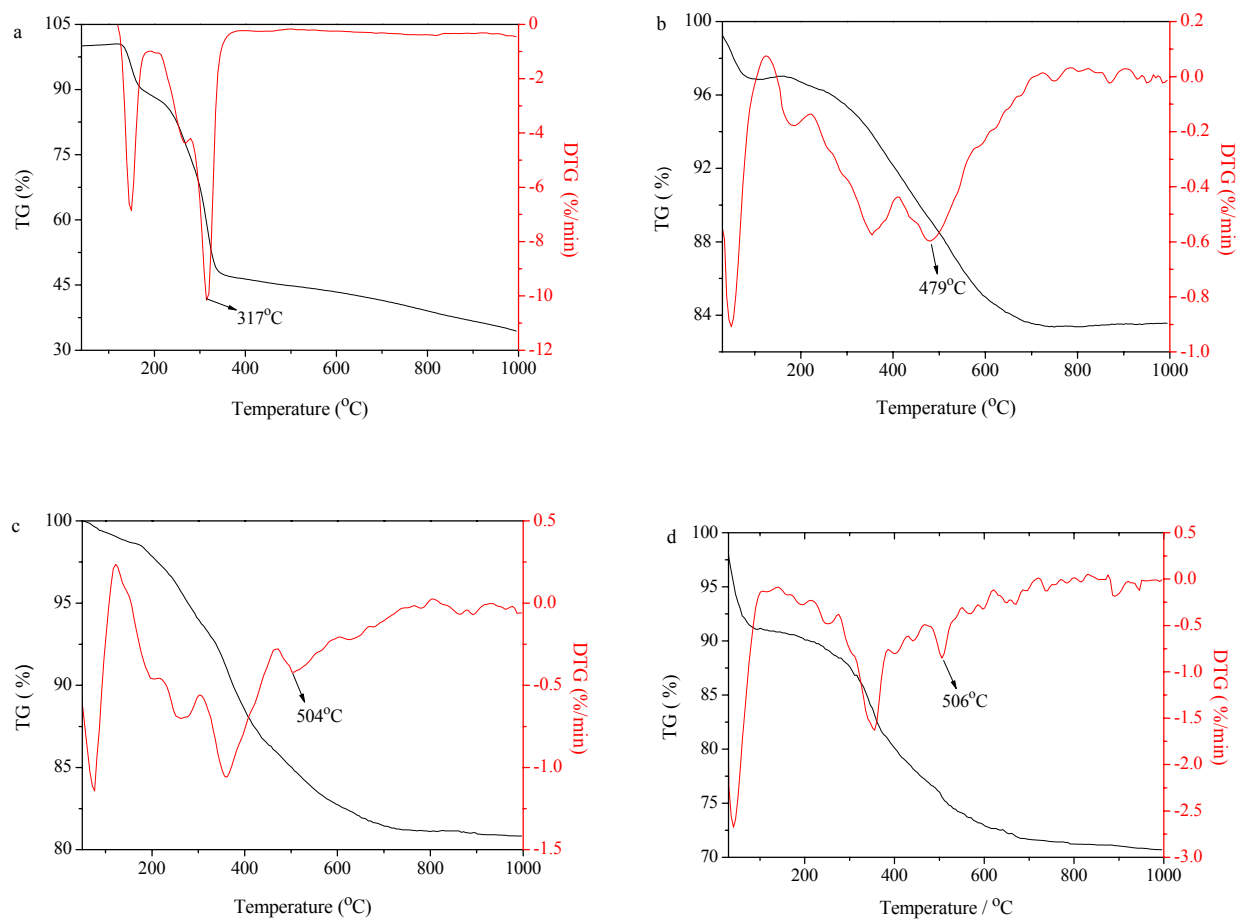

**Fig. S6** Thermogravimetry trace (TG) and differential thermogravimetry trace (DTG) of the materials: (a) TTFA-Eu-PMAA, (b) TTFA-S16, (c) TTFA-S16-Eu, (d) FFFA-S16/PMAA.

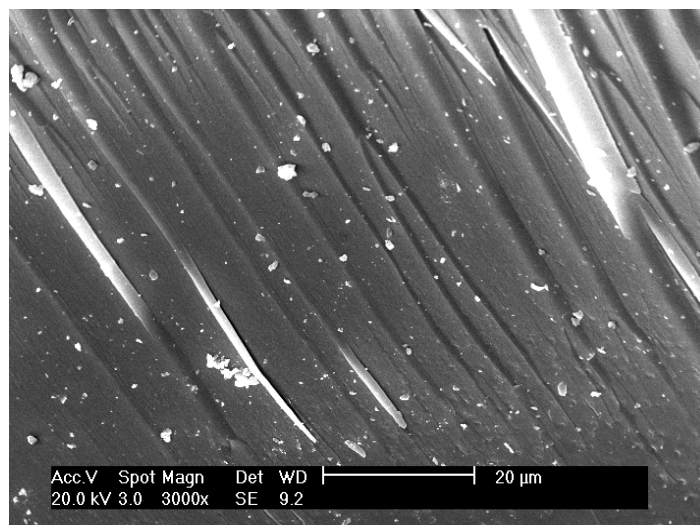

**Fig. S7** The selected SEM image of mesoporous polymeric hybrids TTFA-S16-Eu-PMAA.
